# Supplementary material
Source: PubMed Central journal article supplement (PMC3870697)
Supplement: 1315456110_sd01.pdf [file 1315456110_sd01.pdf]

**Dataset S1. Phylogeny and trait data for comparative analyses.** (A) The phylogeny that was used for the ancestral state estimates of elevation and  $\beta 13$ -  $\beta 83$  genotype as depicted in Figure 4, in Newick format. Node labels are posterior probability estimates for each clade. Branch lengths are proportional to relative time. (B) The data used for comparative analyses of 63 hummingbird species, including the species' maximum elevation, minimum elevation, and the amino acids at positions  $\beta 13$  and  $\beta 83$ .

**A.**

```
(apus_apus:42.5,((florisuga_mellivora:21.58251284,(eutoxeres_condamini:19.59179945,((threnetes_leuc
urus:7.593799152,glaucis_hirsutus:7.593799152)1.00:5.458735986,((phaethornis_syrmatophorus:7.0404
04114,(phaethornis_guy:4.536745179,phaethornis_malaris:4.536745179)0.87:2.503658935)1.00:0.7325
615839,(phaethornis_hispidus:7.526412547,phaethornis_ruber:7.526412547)0.94:0.2465531508)1.00:5.
27956944)1.00:6.539264308)1.00:1.990713397)1.00:0.8030054618,(((doryfera_ludovicae:12.78813896,(
schistes_geoffroyi:11.77392866,colibri_coruscans:11.77392866)1.00:1.014210299)1.00:5.76138279,anth
racothorax_nigricollis:18.54952174)1.00:1.5234818,(((haplophaedia_aureliae:11.4814989,(erioncnemis_a
linae:7.215116008,erioncnemis_luciani:7.215116008)1.00:4.266382893)1.00:2.348433693,((lafresnaya_la
fresnaya:11.83844458,aglaeactis_castelnaudii:11.83844458)0.88:1.356892144,(((ensifera_ensifera:10.2
1230199,pterophanes_cyanopterus:10.21230199)1.00:1.625966458,(boissonneaua_matthewsii:10.1139
4209,ocreatus_underwoodii:10.11394209)1.00:1.724326357)0.97:0.5522489052,(clytolaema_rubricauda:
9.184226467,(heliodoxa_imperatrix:4.600810376,heliodoxa_rubinoides:4.600810376)1.00:0.485043223
3,heliodoxa_leadbeateri:5.085853599)1.00:4.098372868)0.99:3.206290882)1.00:0.4065088099,(coelige
na_coeligena:9.655568467,(coeligena_torquata:6.102444883,(coeligena_violifer:4.772037487,(coeligena
_iris:3.203338608,coeligena_lutetiae:3.203338609)1.00:1.568698878)1.00:1.330407396)1.00:3.5531235
83)1.00:3.141457693)0.73:0.3983105689)1.00:0.6345958663)1.00:1.671283968,(((lophornis_chalybeus:
2.267283906,lophornis_delattrei:2.267283906)1.00:5.543762026,(discosura_longicauda:4.997402833,disc
osura_langsdorffi:4.997402834)1.00:2.813643099)1.00:6.403304237,(phlogophilus_harterti:13.2108949
2,((heliangelus_amethysticollis:3.530452247,(heliangelus_viola:3.261148903,heliangelus_micraster:3.26
1148903)0.99:0.269303344)1.00:8.587493192,((adelomyia_melanogenys:8.596382441,aglaiocercus_kin
gi:8.59638244)1.00:1.364615777,((oreotrochilus_estella:1.211047725,oreotrochilus_melanogaster:1.211
047726)1.00:6.627644559,(polyonymus_caroli:7.495200005,((chalcostigma_herrani:5.130842394,(chalc
ostigma_stanleyi:4.811536371,(chalcostigma_ruficeps:4.571696761,chalcostigma_olivaceum:4.5716967
61)0.46:0.23983961)0.86:0.3193060232)1.00:0.9657565811,(metallura_phoebe:4.476686487,metallura_
tyrianthina:4.476686487)1.00:1.619912488)1.00:1.398601031)0.94:0.3434922789)1.00:2.122305934)1.0
0:2.15694722)1.00:1.092949481)1.00:1.003455251)1.00:1.286866392)1.00:0.8534145773,(patagona_gi
gas:14.38065922,(eugenes_fulgens:11.524263,((calliphlox_amethystina:3.341953595,thaumastura_cora
:3.341953595)1.00:1.683541112,selasphorus_platycercus:5.025494707)1.00:6.498768296)1.00:2.33638
6548,(chlorostilbon_aureoventris:12.43311726,(thalurania_furcata:11.33366768,(taphrospilus_hypostictu
s:8.855630206,((amazilia_amazilia:4.105048477,chrysuronia_oenone:4.105048477)1.00:1.242588118,(a
mazilia_lactea:2.914837093,(amazilia_chionogaster:1.796389023,amazilia_viridicauda:1.796389023)1.0
0:1.118448069)1.00:2.432799503)1.00:3.507993611)1.00:2.478037477)1.00:1.099449577)1.00:1.42753
2291)1.00:0.520009674)1.00:1.973971915)1.00:3.718372406)1.00:2.312514759)1.00:20.1144817);
```

**B.**

| Species                        | Maximum elevation (m) | Minimum elevation (m) | $\beta 13$ | $\beta 83$ |
|--------------------------------|-----------------------|-----------------------|------------|------------|
| <i>Adelomyia melanogenys</i>   | 2900                  | 1000                  | Gly        | Gly        |
| <i>Aglaeactis castelnaudii</i> | 4200                  | 3100                  | Gly        | Ser        |
| <i>Aglaiocercus kingi</i>      | 2600                  | 1300                  | Gly        | Gly        |
| <i>Amazilia amazilia</i>       | 1000                  | 0                     | Gly        | Gly        |
| <i>Amazilia chionogaster</i>   | 2800                  | 0                     | Gly        | Ser        |
| <i>Amazilia lactea</i>         | 900                   | 0                     | Gly        | Gly        |
| <i>Amazilia viridicauda</i>    | 3100                  | 1000                  | Gly        | Ser        |

|                                    |      |      |     |     |
|------------------------------------|------|------|-----|-----|
| <i>Anthracothonax nigricollis</i>  | 1000 | 0    | Gly | Gly |
| <i>Apus apus</i>                   | 3300 | 0    | Gly | Ser |
| <i>Boissonneaua matthewsii</i>     | 2700 | 1550 | Gly | Ser |
| <i>Calliphlox amethystina</i>      | 1050 | 0    | Gly | Gly |
| <i>Chalcostigma herrani</i>        | 3400 | 2700 | Gly | Ser |
| <i>Chalcostigma olivaceum</i>      | 4500 | 3150 | Ser | Ser |
| <i>Chalcostigma ruficeps</i>       | 3300 | 2250 | Gly | Ser |
| <i>Chalcostigma stanleyi</i>       | 4400 | 3350 | Ser | Ser |
| <i>Chlorostilbon aureoventris</i>  | 2500 | 0    | Gly | Gly |
| <i>Chrysuronia oenone</i>          | 1650 | 0    | Gly | Gly |
| <i>Clytolaema rubricauda</i>       | 2000 | 750  | Gly | Gly |
| <i>Coeligena coeligena</i>         | 2200 | 1000 | Gly | Gly |
| <i>Coeligena iris</i>              | 3500 | 1500 | Gly | Ser |
| <i>Coeligena lutetiae</i>          | 3750 | 3000 | Gly | Ser |
| <i>Coeligena torquata</i>          | 2800 | 1700 | Gly | Gly |
| <i>Coeligena violifer</i>          | 3900 | 2500 | Gly | Ser |
| <i>Colibri coruscans</i>           | 3600 | 1300 | Gly | Ser |
| <i>Discosura langsdorffi</i>       | 800  | 0    | Gly | Gly |
| <i>Discosura longicauda</i>        | 700  | 0    | Gly | Gly |
| <i>Doryfera ludovicae</i>          | 2800 | 1200 | Gly | Asn |
| <i>Ensifera ensifera</i>           | 3600 | 2200 | Gly | Ser |
| <i>Eriocnemis alinae</i>           | 2800 | 2000 | Gly | Ser |
| <i>Eriocnemis luciani</i>          | 3750 | 2600 | Gly | Ser |
| <i>Eugenes fulgens</i>             | 3300 | 1300 | Gly | Ser |
| <i>Eutoxeres condamini</i>         | 2750 | 0    | Gly | Gly |
| <i>Florisuga mellivora</i>         | 900  | 0    | Gly | Gly |
| <i>Glaucis hirsutus</i>            | 1100 | 0    | Gly | Gly |
| <i>Haplophaedia aureliae</i>       | 2500 | 1400 | Gly | Gly |
| <i>Heliangelus amethysticollis</i> | 3300 | 1800 | Gly | Gly |
| <i>Heliangelus micraster</i>       | 2900 | 2400 | Gly | Gly |
| <i>Heliangelus viola</i>           | 3050 | 2150 | Gly | Gly |
| <i>Heliodoxa imperatrix</i>        | 1800 | 900  | Gly | Gly |
| <i>Heliodoxa leadbeateri</i>       | 2300 | 1050 | Gly | Gly |
| <i>Heliodoxa rubinoides</i>        | 2650 | 1700 | Gly | Gly |
| <i>Lafresnaya lafresnayi</i>       | 3350 | 2300 | Gly | Ser |
| <i>Lophornis chalybeus</i>         | 600  | 0    | Gly | Gly |
| <i>Lophornis delattrei</i>         | 2000 | 0    | Gly | Gly |
| <i>Metallura phoebe</i>            | 4400 | 2500 | Gly | Ser |
| <i>Metallura tyrianthina</i>       | 3500 | 2400 | Gly | Ser |
| <i>Ocreatus underwoodii</i>        | 2500 | 1050 | Gly | Ser |
| <i>Oreotrochilus estella</i>       | 4600 | 3400 | Ser | Ser |
| <i>Oreotrochilus melanogaster</i>  | 4800 | 3500 | Ser | Ser |
| <i>Patagona gigas</i>              | 4300 | 0    | Ser | Ser |

|                                  |      |      |     |     |
|----------------------------------|------|------|-----|-----|
| <i>Phaethornis guy</i>           | 2000 | 800  | Gly | Gly |
| <i>Phaethornis hispidus</i>      | 500  | 0    | Gly | Gly |
| <i>Phaethornis malaris</i>       | 1300 | 0    | Gly | Gly |
| <i>Phaethornis ruber</i>         | 900  | 0    | Gly | Gly |
| <i>Phaethornis syrmatophorus</i> | 2400 | 1100 | Gly | Gly |
| <i>Phlogophilus harterti</i>     | 1200 | 750  | Gly | Ala |
| <i>Polyonymus caroli</i>         | 2800 | 1500 | Gly | Ser |
| <i>Pterophanes cyanopterus</i>   | 3700 | 2600 | Gly | Ser |
| <i>Schistes geoffroyi</i>        | 2250 | 1100 | Gly | Gly |
| <i>Selasphorus platycercus</i>   | 3750 | 1900 | Gly | Ser |
| <i>Taphrospilus hypostictus</i>  | 1350 | 750  | Gly | Gly |
| <i>Thalurania furcata</i>        | 1700 | 0    | Gly | Ser |
| <i>Thaumastura cora</i>          | 3000 | 0    | Gly | Ser |
| <i>Threnetes leucurus</i>        | 1050 | 0    | Gly | Gly |

---
